# Supplementary material
Source: MDPI journal article supplement (https://www.mdpi.com/2227-9717/11/9/2565)
Supplement: s1 [file s1]

## Supporting Information

**Figure S1.** ESI-MS spectra of the Crabwood Oil (CWO) and its fractions.

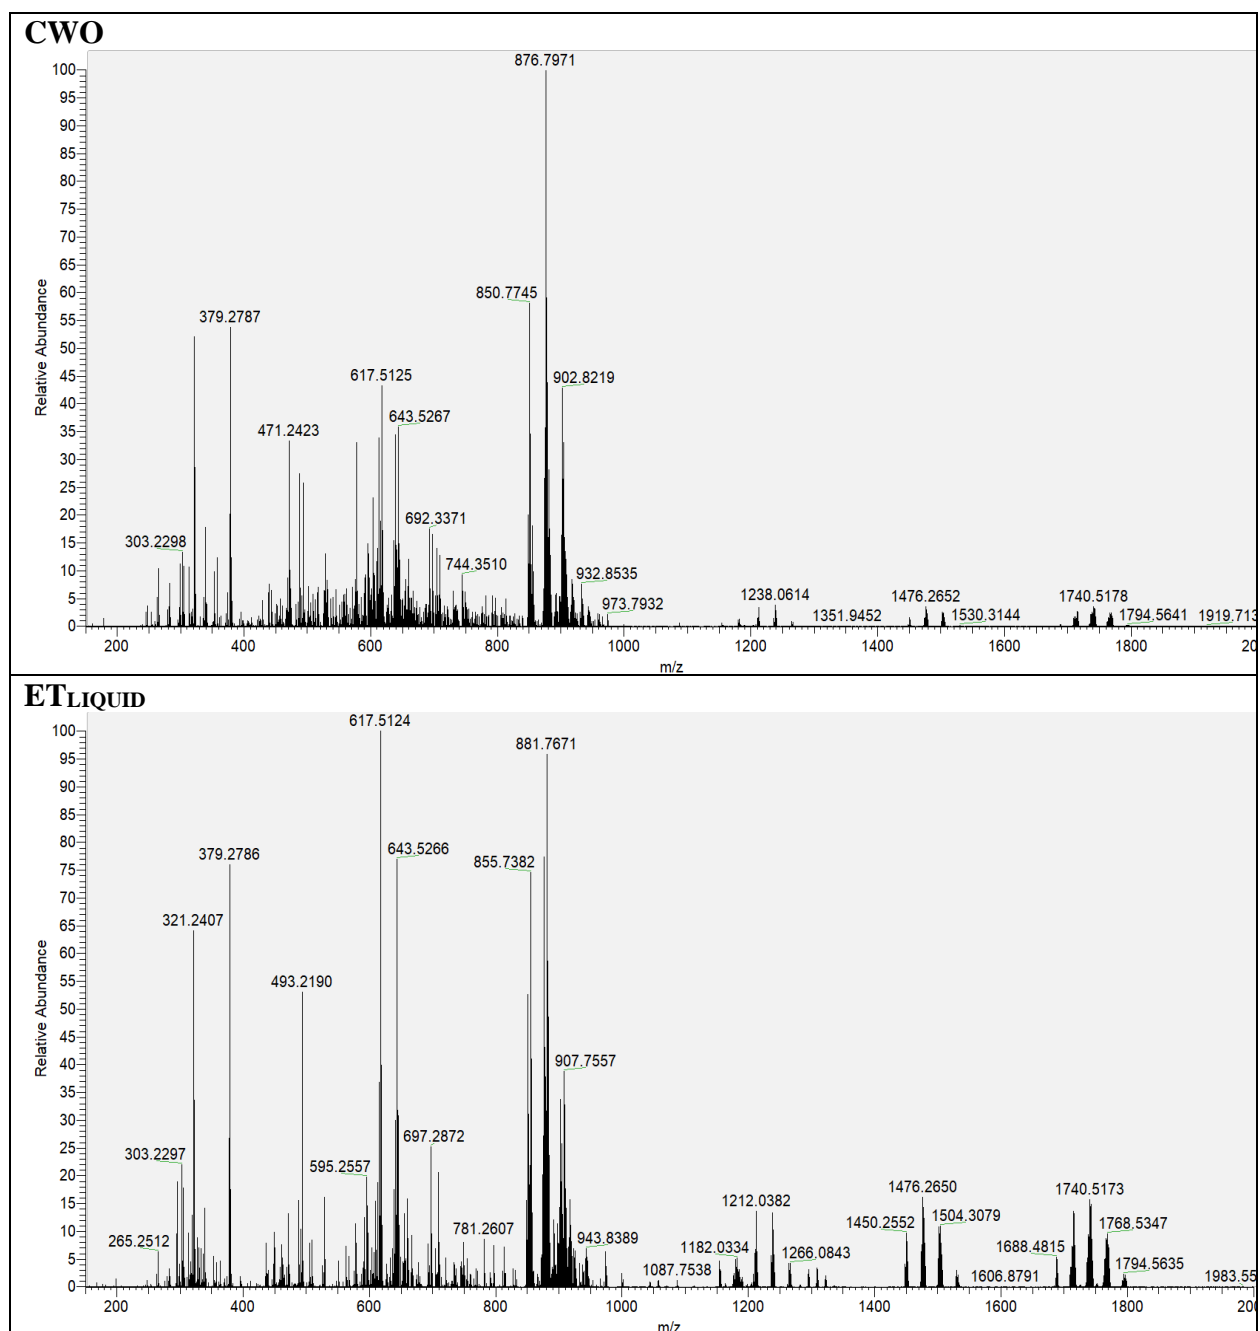

# ET SOLID

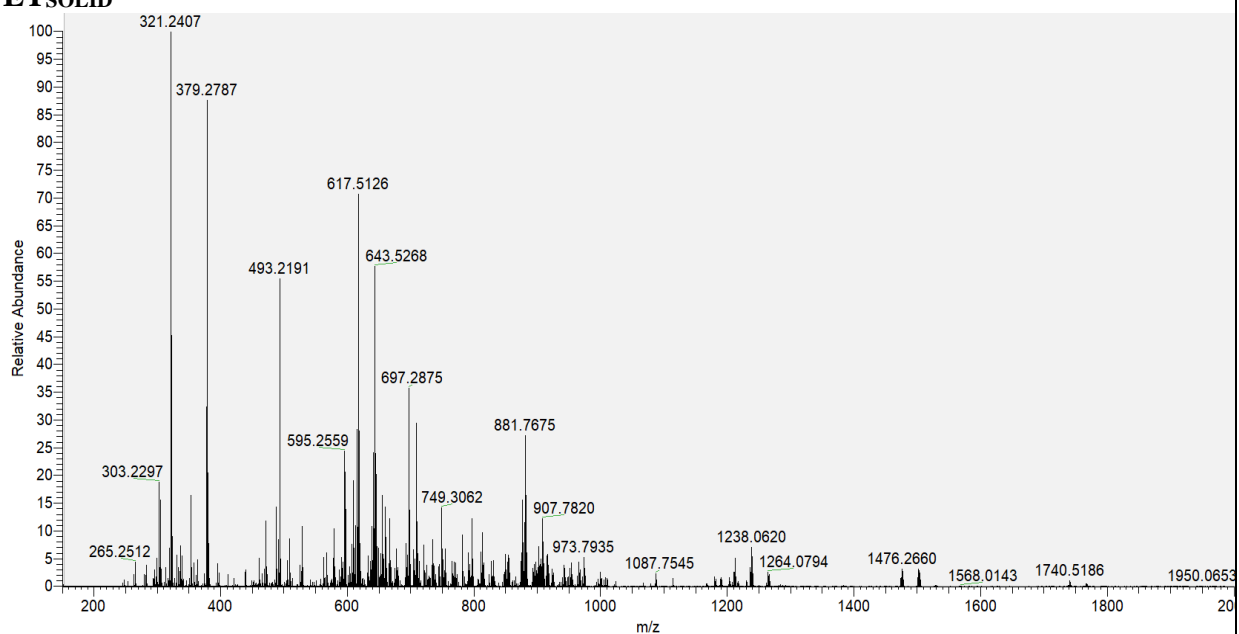

# DLIQUID

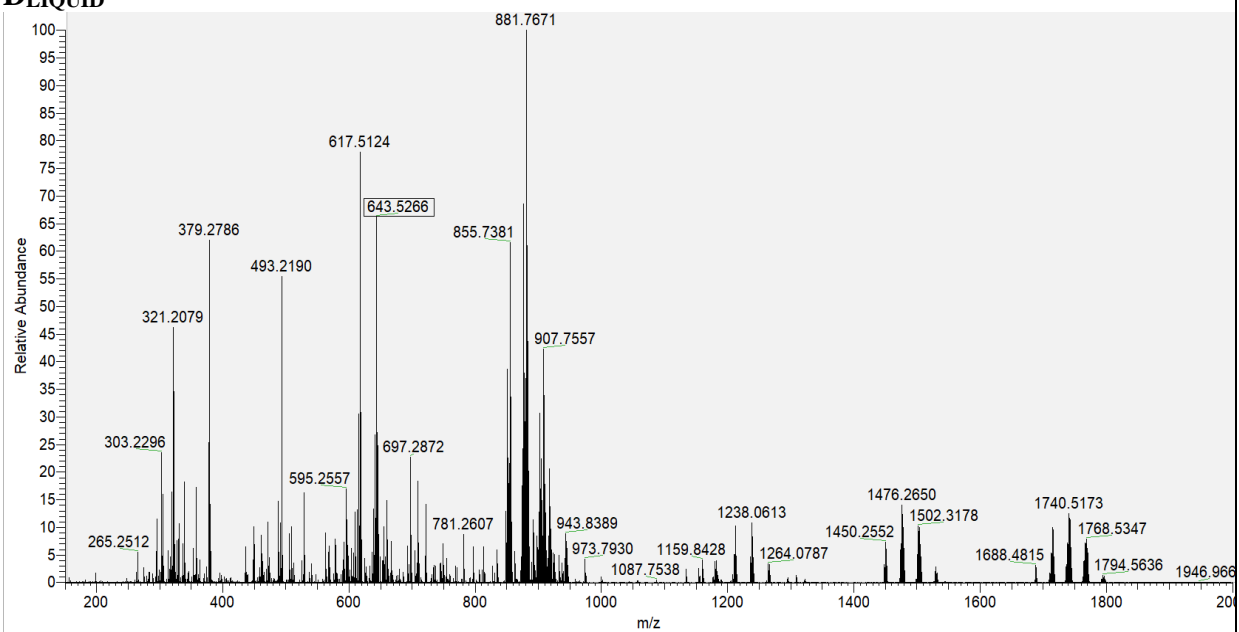

## DSOLID

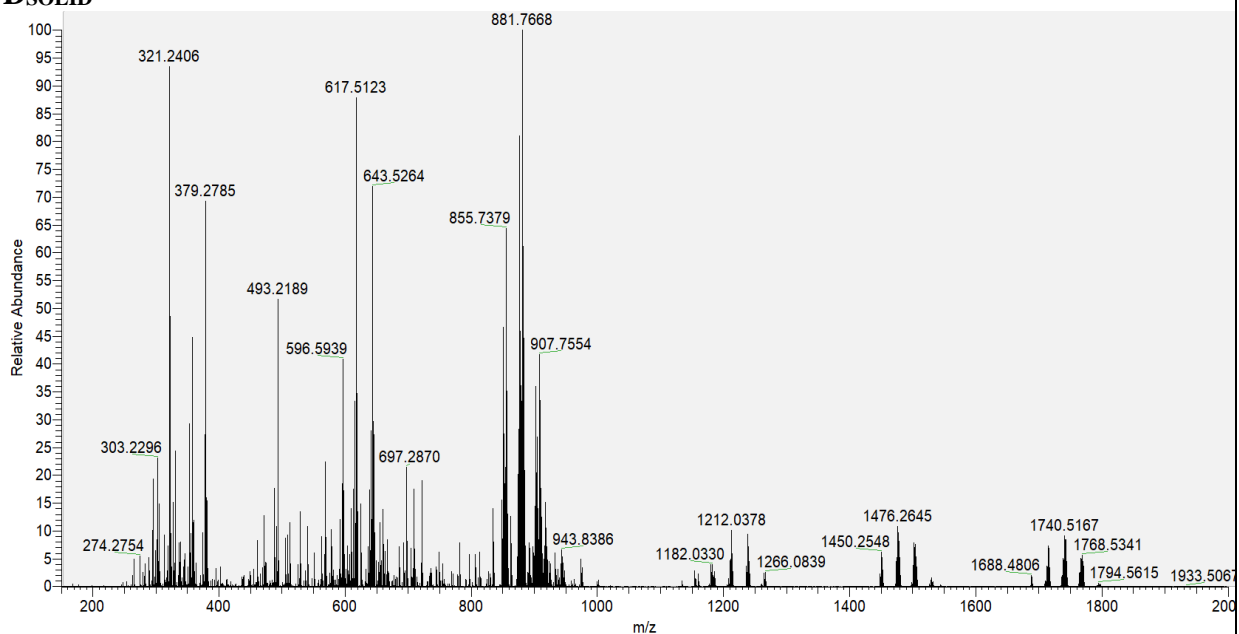

## ACLIQUID

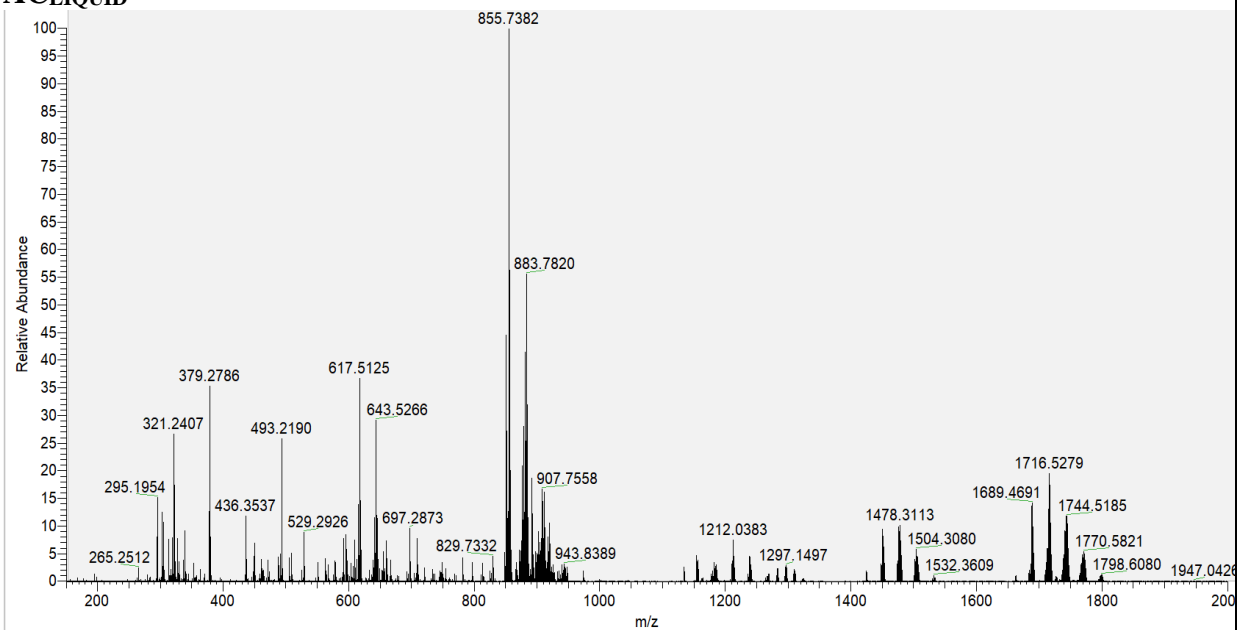

# ACSolid

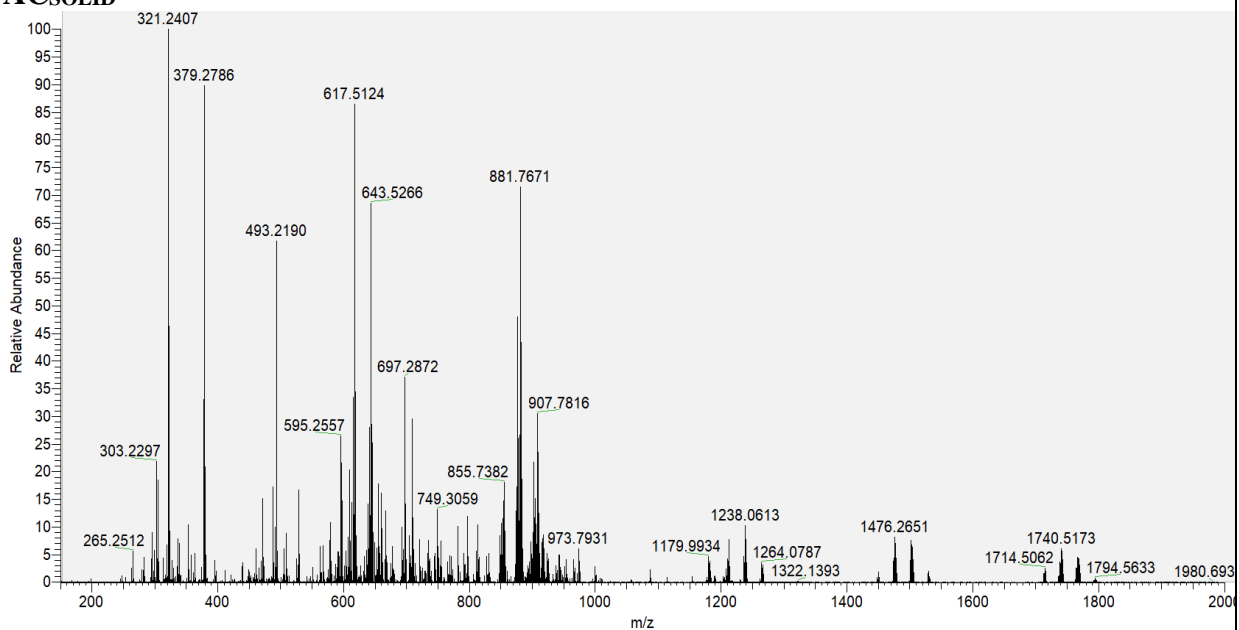

# EASolid

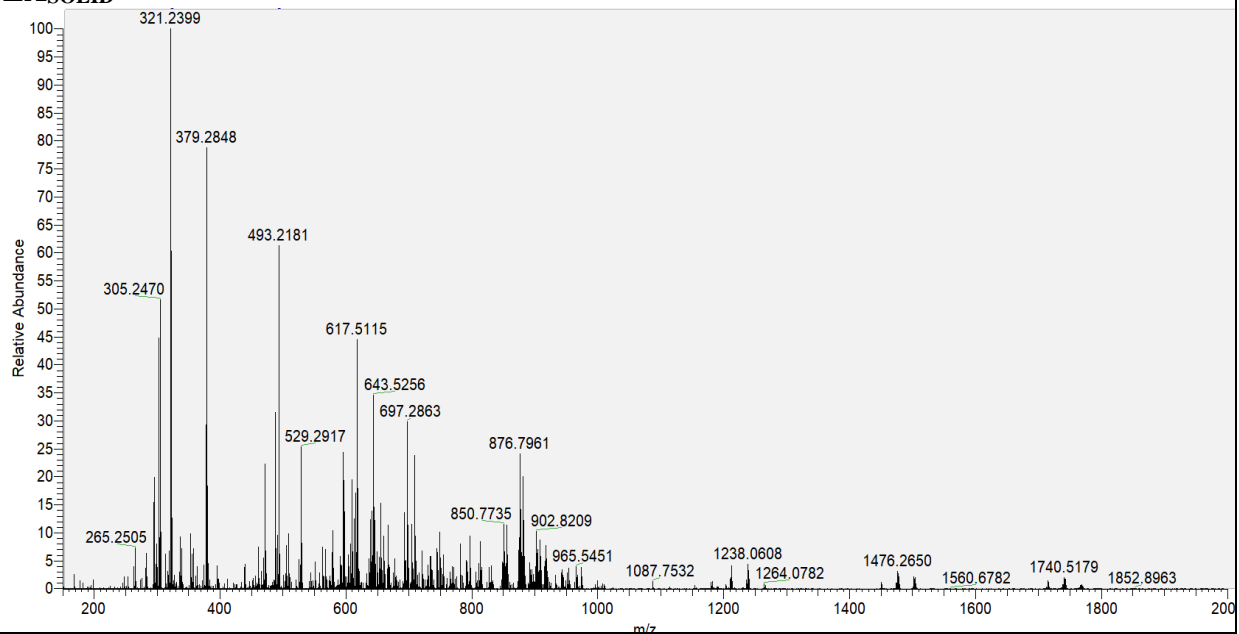

# EALIQUD

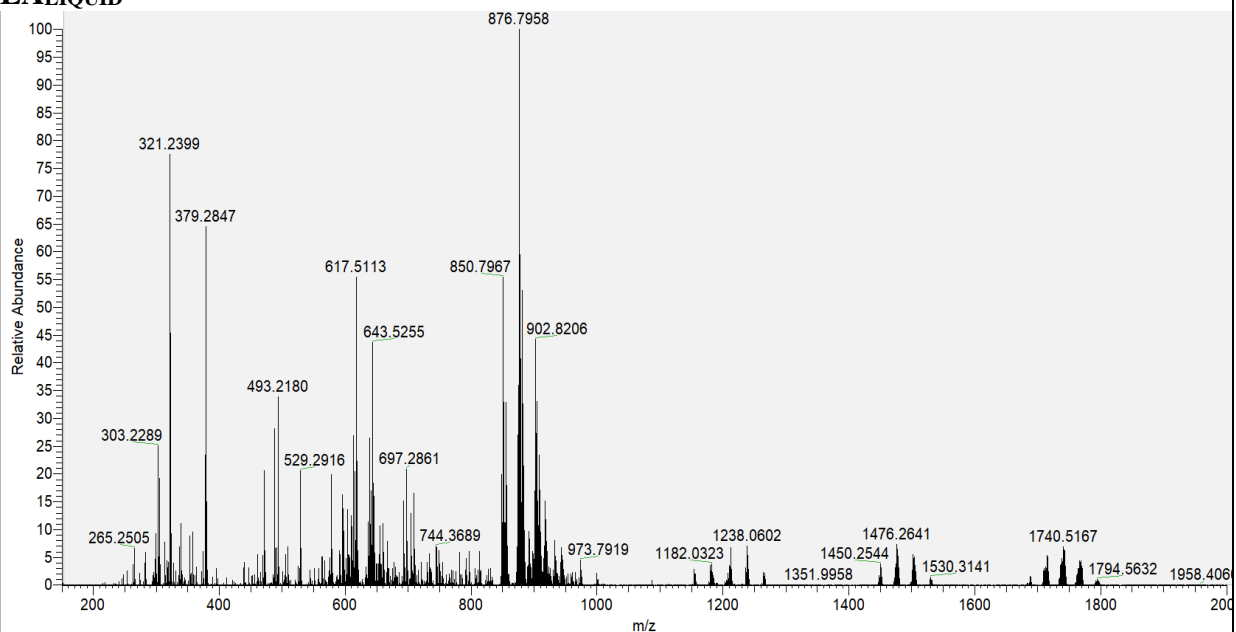

# NLIQUD

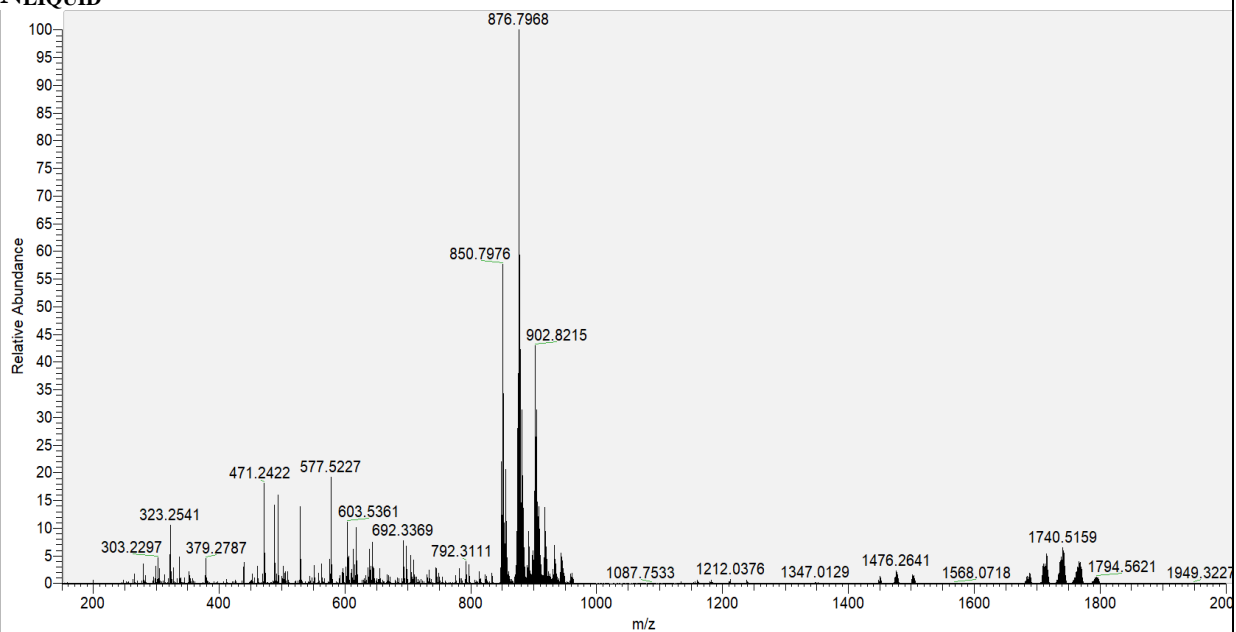

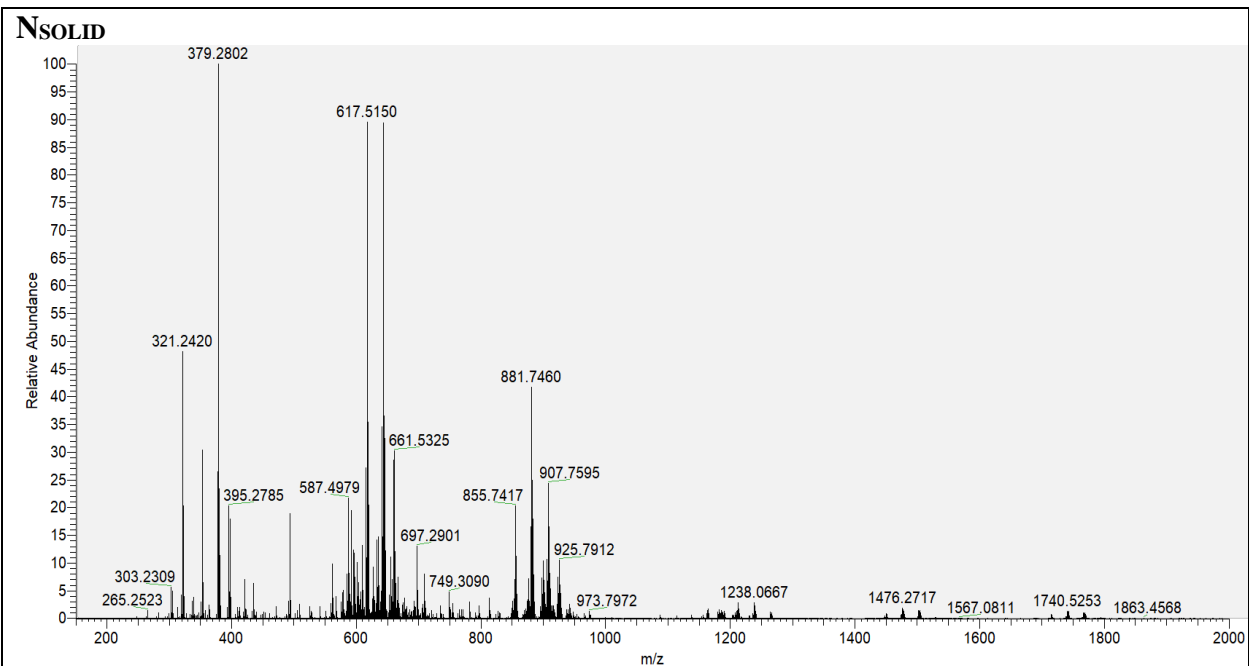

**Figure S2.** TGA and DTG stacks of CWO and its stearin and olein fractions.

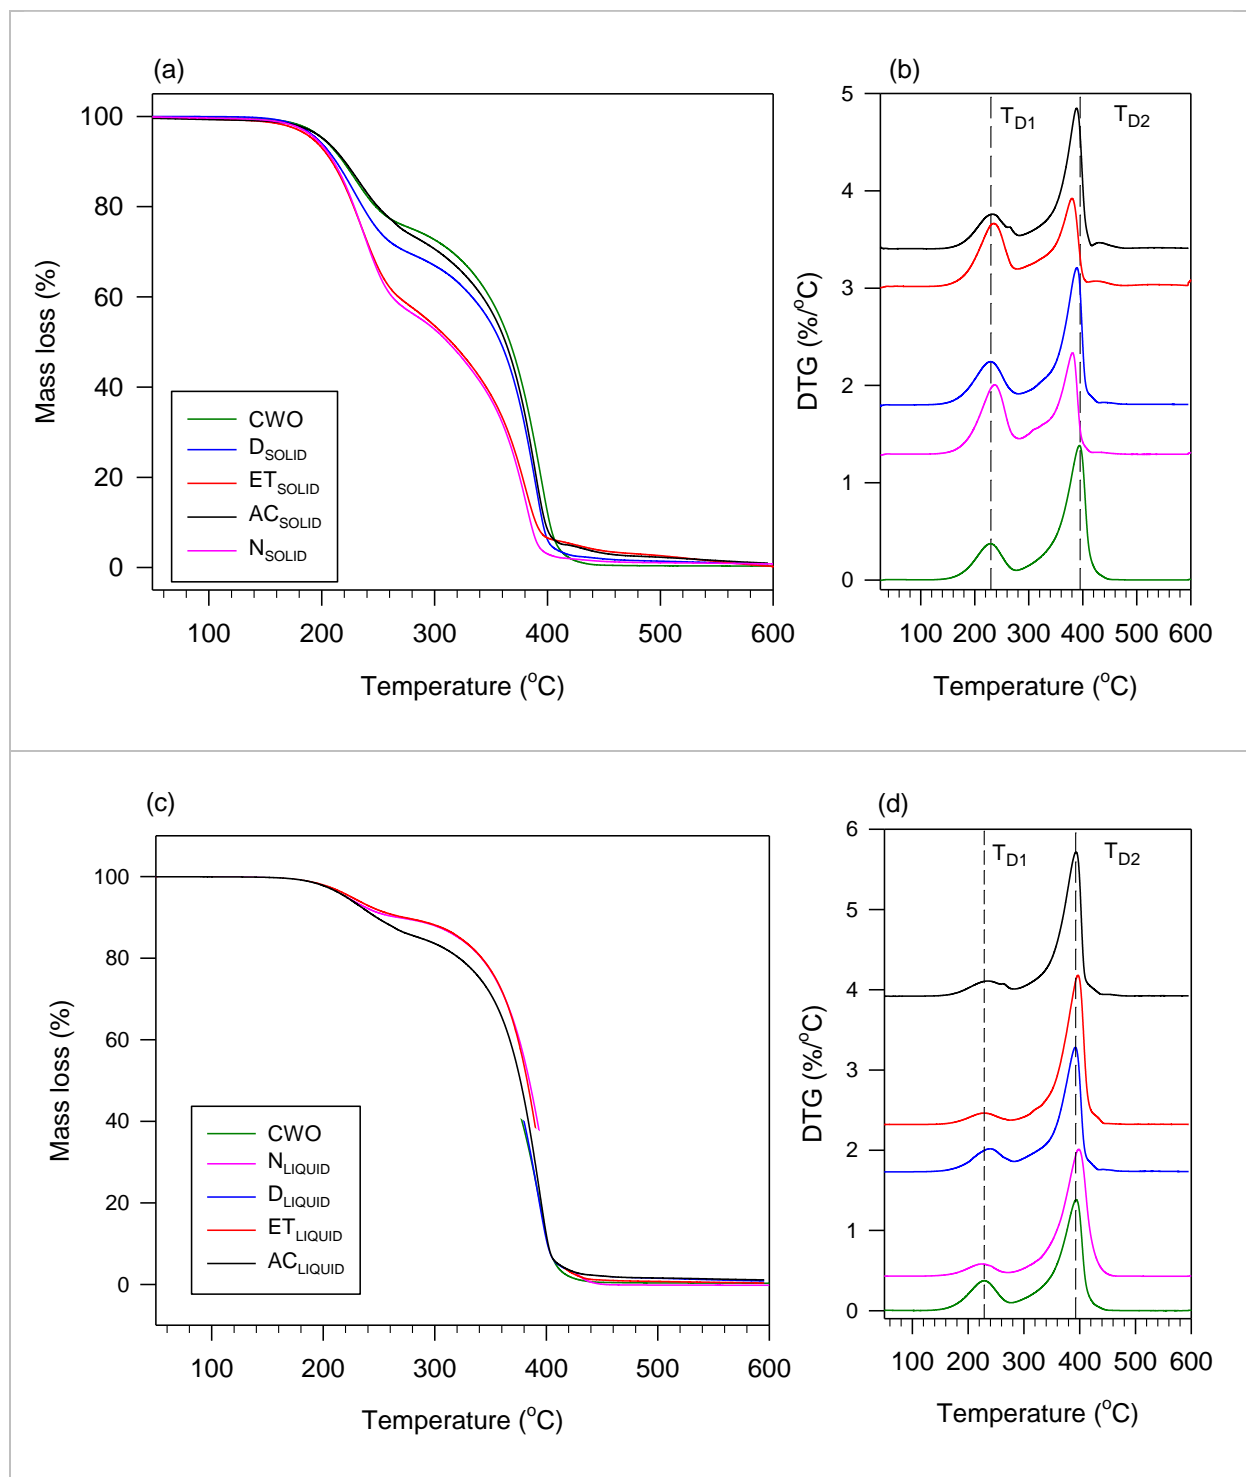

**Table S1.** Relative abundance percentages of assigned lipids in CWO and its fractions (a) TAGs, (b) DAGs and (c) MAGs and (d) FFAs. The most predominant compound in each group is highlighted. ND: Not Detected, - Below the detection limit

a) Triacylglycerols (TAGs)

| Compound            | Relative abundance (%) |               |                |                |                 |                |                 |                 |                |               |                |
|---------------------|------------------------|---------------|----------------|----------------|-----------------|----------------|-----------------|-----------------|----------------|---------------|----------------|
| <b>G1: SSS</b>      | <b>CWO</b>             | <b>DSOLID</b> | <b>DLIQUID</b> | <b>ETSOLID</b> | <b>ETLIQUID</b> | <b>ACSOLID</b> | <b>ACLIQUID</b> | <b>EALIQUID</b> | <b>EASOLID</b> | <b>NSOLID</b> | <b>NLIQUID</b> |
| SSS                 | 0.2                    | 0.4           | 0.4            | 0              | 0.4             | 0.2            | 1.1             | 0.5             | 0.2            | 0.6           | 0.8            |
| PSS                 | 1.9                    | 2.1           | 1.6            | 0.2            | 2.0             | 0.6            | 3.8             | 1.9             | 1.1            | 0.5           | 2.1            |
| PPS                 | 3.0                    | 3.7           | 2.8            | 0.2            | 3.4             | 1.1            | 6.7             | 3.3             | 3.5            | 2.6           | 3.3            |
| PPP                 | 0.0                    | 0.7           | 0.0            | 0              | 0.1             | 0              | 1.5             | 0.2             | 0              | 0.2           | 0.2            |
| <b>Total SSS</b>    | <b>5.1</b>             | <b>6.9</b>    | <b>4.8</b>     | <b>0.4</b>     | <b>5.9</b>      | <b>1.9</b>     | <b>13.1</b>     | <b>5.9</b>      | <b>4.8</b>     | <b>3.9</b>    | <b>6.4</b>     |
| <b>G2: SSU</b>      | <b>CWO</b>             | <b>DSOLID</b> | <b>DLIQUID</b> | <b>ETSOLID</b> | <b>ETLIQUID</b> | <b>ACSOLID</b> | <b>ACLIQUID</b> | <b>EALIQUID</b> | <b>EASOLID</b> | <b>NSOLID</b> | <b>NLIQUID</b> |
| PSO                 | 9.3                    | 12.4          | 10.9           | 6.6            | 12.1            | 7.7            | 18.4            | 9.9             | 7.9            | 10.9          | 9.5            |
| PPO                 | 13.8                   | 4.8           | 15.6           | 6.2            | 18.8            | 7.9            | 33.0            | 15.2            | 15.7           | 12.3          | 14.4           |
| SSL, SOO            | 7.1                    | 11.4          | 8.6            | 9.7            | 8.2             | 10.3           | 4.8             | 7.9             | 8.0            | 10.1          | 6.9            |
| PPL                 | 4.4                    | 6.1           | 5.5            | 6.8            | 5.5             | 6.4            | 4.2             | 5.2             | 6.2            | 4.3           | 5.0            |
| PPLn                | 4.3                    | 1.1           | 0.9            | 0.0            | 1.2             | 0.3            | 1.4             | 2.4             | 1.3            | 0             | 3.7            |
| Total SSU           | 38.9                   | 35.8          | 41.5           | 29.3           | 45.8            | 32.6           | 61.8            | 40.6            | 39.1           | 37.6          | 39.5           |
| <b>G3: SUU</b>      | <b>CWO</b>             | <b>DSOLID</b> | <b>DLIQUID</b> | <b>ETSOLID</b> | <b>ETLIQUID</b> | <b>ACSOLID</b> | <b>ACLIQUID</b> | <b>EALIQUID</b> | <b>EASOLID</b> | <b>NSOLID</b> | <b>NLIQUID</b> |
| POO                 | 21.5                   | 28.2          | 25.4           | 32.8           | 24.1            | 31.2           | 13.7            | 24.5            | 27.6           | 25.3          | 21.9           |
| PLO                 | 5.1                    | 9.4           | 9.4            | 13.9           | 8.0             | 11.6           | 3.7             | 6.2             | 8.1            | 10.1          | 6.1            |
| PLL                 | 9.1                    | 2.5           | 2.0            | 2.1            | 2.2             | 2.3            | 0.8             | 5.2             | 3.4            | 0.5           | 7.8            |
| LLS, OOL            | 6.0                    | 3.8           | 3.5            | 3.8            | 3.2             | 4.1            | 1.5             | 4.3             | 4.0            | 4.4           | 5.1            |
| Total SUU           | 41.7                   | 43.9          | 40.3           | 62.6           | 37.5            | 49.2           | 19.7            | 40.2            | 43.1           | 40.3          | 40.9           |
| <b>G4: UUU</b>      | <b>CWO</b>             | <b>DSOLID</b> | <b>DLIQUID</b> | <b>ETSOLID</b> | <b>ETLIQUID</b> | <b>ACSOLID</b> | <b>ACLIQUID</b> | <b>EALIQUID</b> | <b>EASOLID</b> | <b>NSOLID</b> | <b>NLIQUID</b> |
| OOO                 | 9.0                    | 11.4          | 10.6           | 14.9           | 9.4             | 13.4           | 4.8             | 9.9             | 10.7           | 14.5          | 9.0            |
| OLL, OOLn           | 4.4                    | 1.3           | 2.1            | 1.1            | 1.1             | 1.3            | 0.4             | 2.6             | 1.6            | 0             | 3.8            |
| <b>Total UUU</b>    | <b>13.4</b>            | <b>12.7</b>   | <b>12.7</b>    | <b>16.0</b>    | <b>10.5</b>     | <b>14.7</b>    | <b>5.2</b>      | <b>12.5</b>     | <b>12.3</b>    | <b>14.5</b>   | <b>12.8</b>    |
| <b>Unclassified</b> | <b>CWO</b>             | <b>DSOLID</b> | <b>DLIQUID</b> | <b>ETSOLID</b> | <b>ETLIQUID</b> | <b>ACSOLID</b> | <b>ACLIQUID</b> | <b>EALIQUID</b> | <b>EASOLID</b> | <b>NSOLID</b> | <b>NLIQUID</b> |



|       |     |     |     |     |     |     |     |     |     |     |     |
|-------|-----|-----|-----|-----|-----|-----|-----|-----|-----|-----|-----|
| TG1   | 0   | 0   | 0.1 | 0.1 | 0.4 | 0.4 | 0.1 | 0   | 0   | 0   | 0   |
| TG2   | 0.8 | 0.7 | 0.7 | 1.6 | 0   | 1   | 0   | 0.7 | 0.8 | 3.9 | 0.5 |
| Total | 0.8 | 0.7 | 0.8 | 1.7 | 0.4 | 1.4 | 0.1 | 0.7 | 0.8 | 3.9 | 0.5 |

Abbreviations: S: saturated, U: Unsaturated; P, Palmitic acid; Po, palmitoleic acid; O, oleic acid; S, stearic acid; L, linoleic acid; Ln, linolenic acid. TG1= TG (16:1\_18:4 \_19:1), TG2= TAG (18:0/18:2/19:0)

b) Diacylglycerols (DAGs)

| Elemental composition | Putative compound                                                               | <i>m/z</i><br>[M+Na] <sup>+</sup> | Relative abundance (%) |                    |                     |                     |                      |                     |                      |                     |                      |                    |                     |
|-----------------------|---------------------------------------------------------------------------------|-----------------------------------|------------------------|--------------------|---------------------|---------------------|----------------------|---------------------|----------------------|---------------------|----------------------|--------------------|---------------------|
|                       |                                                                                 |                                   | CWO                    | D <sub>SOLID</sub> | D <sub>LIQUID</sub> | ET <sub>SOLID</sub> | ET <sub>LIQUID</sub> | AC <sub>SOLID</sub> | AC <sub>LIQUID</sub> | EA <sub>SOLID</sub> | EA <sub>LIQUID</sub> | N <sub>SOLID</sub> | N <sub>LIQUID</sub> |
| C37H70O5              | 1-Oleoyl-2-palmitoylglycerol                                                    | 617.5121                          | 25.1                   | 28.6               | 31.3                | 31.9                | 32.6                 | 32.5                | 32.6                 | 28.98               | 29.04                | 24.9               | 21.6                |
| C39H72O5              | 1,3-Diolein                                                                     | 643.5277                          | 20.8                   | 23.4               | 26.6                | 26.0                | 25.1                 | 25.8                | 25.9                 | 22.8                | 23.2                 | 24.9               | 15.8                |
| C37H72O4              | 1-O-hexadecyl-2-(9Z-octadecenoyl)-sn-glycerol (DG (O-16:0/18:1))                | 603.5328                          | 13.5                   | 2.4                | 1.9                 | 1.6                 | 2.3                  | 2.1                 | 0.6                  | 7.1                 | 2.4                  | 1.6                | 23.8                |
| C37H68O5              | 1-hexadecanoyl-2-(9Z,12Z-octadecadienoyl)-sn-glycerol (DG (18:2/16:0))          | 615.4964                          | 11.0                   | 10.8               | 12.3                | 12.8                | 12.0                 | 12.5                | 12.3                 | 10.7                | 11.2                 | 7.6                | 7.2                 |
| C39H68O5              | 1,3-dilinoleoyl-sn-glycerol-d5                                                  | 644.5278                          | 8.7                    | 9.7                | 11.0                | 10.8                | 10.4                 | 10.7                | 10.6                 | 9.6                 | 9.5                  | 9.7                | 6.3                 |
| C39H70O5              | 1-(9Z-octadecenoyl)-2-(9Z,12Z-octadecadienoyl)-sn-glycerol (DG (18:1/18:2/0:0)) | 641.5121                          | 0.0                    | 9.0                | 0.0                 | 0                   | 0.0                  | 0.0                 | 0.0                  | 8.2                 | 8.8                  | 9.6                | 0.0                 |
| C39H74O5              | 1-octadecanoyl-2-(9Z-octadecenoyl)-sn-glycerol (DG (18:0/18:1))                 | 645.5434                          | 6.9                    | 8.9                | 10.0                | 9.1                 | 10.0                 | 9.5                 | 10.1                 | 3.0                 | 8.0                  | 9.0                | 5.8                 |
| C34H66O5              | 1-pentadecanoyl-2-hexadecanoyl-sn-glycerol (DG (15:0/16:0/0:0))                 | 577.4808                          | 5.1                    | 1.1                | 1.0                 | 0.7                 | 1.6                  | 1.2                 | 1.2                  | 2.1                 | 1.7                  | 0.4                | 9.5                 |
| C37H72O5              | 1-stearoyl-2-palmitoyl-sn-glycerol (DG (16:0/18:0))                             | 619.5277                          | 3.5                    | 4.4                | 3.1                 | 3.5                 | 3.6                  | 3.2                 | 5.0                  | 4.3                 | 2.7                  | 5.7                | 3.3                 |

|          |                                                                                                     |          |     |     |     |     |     |     |     |      |      |     |     |
|----------|-----------------------------------------------------------------------------------------------------|----------|-----|-----|-----|-----|-----|-----|-----|------|------|-----|-----|
| C36H68O5 | 1-(9Z-hexadecenoyl)-2-heptadecanoyl-sn-glycerol (DG(16:1/17:0/0:0))                                 | 603.4964 | 2.6 | 0.3 | 0.7 | 0.1 | 0.9 | 0.5 | 0.7 | 1.2  | 0.7  | 1.3 | 4.2 |
| C37H70O6 | 1,2-Dipalmitoyl 3-acetyl glycerol                                                                   | 633.5070 | 1.2 | 1.0 | 1.2 | 2.2 | 0.3 | 1.8 | 0.0 | 1.7  | 1.8  | 4.0 | 1.1 |
| C34H64O5 | 1-pentadecanoyl-2-(9Z-hexadecenoyl)-sn-glycerol (DG (15:0/16:1))                                    | 575.4651 | 0.9 | 0.1 | 0.1 | 0   | 0.2 | 0.1 | 0.1 | 0.28 | 0.25 | 0.2 | 1.0 |
| C41H64O5 | 1-(6Z,9Z,12Z,15Z-octadecatetraenoyl)-2-(5Z,8Z,11Z,14Z-eicosatetraenoyl)-sn-glycerol (DG(18:4/20:4)) | 659.4651 | 0.7 | 0.1 | 0.8 | 1.2 | 0.8 | 0.0 | 0.9 | 0.1  | 0.8  | 1.3 | 0.3 |

c) Monoacylglycerols (MAGs).

| Elemental composition | Putative compound           | <i>m/z</i> [M+Na] <sup>+</sup> | Relative abundance (%) |                    |                     |                     |                      |                     |                      |                     |                      |                     |                     |
|-----------------------|-----------------------------|--------------------------------|------------------------|--------------------|---------------------|---------------------|----------------------|---------------------|----------------------|---------------------|----------------------|---------------------|---------------------|
|                       |                             |                                | CWO                    | D <sub>SOLID</sub> | D <sub>LIQUID</sub> | ET <sub>SOLID</sub> | ET <sub>LIQUID</sub> | AC <sub>SOLID</sub> | AC <sub>LIQUID</sub> | EA <sub>SOLID</sub> | EA <sub>LIQUID</sub> | NS <sub>SOLID</sub> | N <sub>LIQUID</sub> |
| C21H40O4              | 2-monoolein                 | 379.2824                       | 50.1                   | 46.5               | 62.2                | 58.5                | 65.6                 | 78.5                | 67.0                 | 58.3                | 62.3                 | 58.1                | 51.7                |
| C21H38O4              | rac-1-monolinoleoylglycerol | 377.2668                       | 19.2                   | 18.7               | 26.0                | 21.7                | 23.2                 | 6.3                 | 24.2                 | 21.2                | 23.2                 | 15.4                | 17.1                |
| C19H40O3              | 1-O-hexadecyl-sn-glycerol   | 339.2875                       | 17.0                   | 4.2                | 4.9                 | 3.6                 | 6.2                  | 5.9                 | 3.2                  | 10.1                | 5.0                  | 2.2                 | 9.7                 |
| C19H38O4              | 2-Monopalmitin              | 353.2668                       | 9.4                    | 20.0               | 4.1                 | 11.0                | 3.4                  | 9.2                 | 4.0                  | 8.0                 | 7.8                  | 17.7                | 17.4                |
| C21H42O4              | 1-Monostearin               | 381.2981                       | 4.3                    | 10.6               | 2.8                 | 5.2                 | 1.7                  | 0.0                 | 1.7                  | 2.4                 | 1.6                  | 6.6                 | 4.2                 |

d) Free Fatty Acids (FFA).

| Elemental composition     | Putative compound                        | m/z<br>[M+Na] <sup>+</sup> | Relative abundance (%) |                    |                     |                     |                      |                     |                      |                     |                      |                     |                     |
|---------------------------|------------------------------------------|----------------------------|------------------------|--------------------|---------------------|---------------------|----------------------|---------------------|----------------------|---------------------|----------------------|---------------------|---------------------|
|                           |                                          |                            | CWO                    | D <sub>SOLID</sub> | D <sub>LIQUID</sub> | ET <sub>SOLID</sub> | ET <sub>LIQUID</sub> | AC <sub>SOLID</sub> | AC <sub>LIQUID</sub> | EA <sub>SOLID</sub> | EA <sub>LIQUID</sub> | NS <sub>SOLID</sub> | N <sub>LIQUID</sub> |
| C18H32O2                  | linoleic acid (L)                        | 303.2300                   | 11.2                   | 11.3               | 22.5                | 9.9                 | 12.1                 | 11.2                | 16.6                 | 14.4                | 16.5                 | 7.1                 | 17.3                |
| C18H34O2                  | oleic acid (O)                           | 305.2456                   | 9.2                    | 6.9                | 15.4                | 7.7                 | 9.8                  | 9.1                 | 14.2                 | 11.1                | 19.0                 | 6.1                 | 10.0                |
| C18H34O3                  | 10-keto stearic/<br>hydroxyoleic acids   | 321.2406                   | 43.7                   | 45.6               | 43.8                | 52.7                | 48.5                 | 51.0                | 35.5                 | 44.6                | 36.7                 | 59.5                | 19.8                |
| C16H32O5                  | 11,12,15-<br>trihydroxy<br>palmitic acid | 327.2147                   | ND                     | 4.4                | 4.9                 | 0.5                 | 3.6                  | 1.5                 | 7.4                  | 1.2                 | 0.6                  | 0.5                 | 4.5                 |
| C18H30O2                  | Linolenic acid<br>(Ln)                   | 301.2143                   | 0.1                    | 4.2                | 0.6                 | 0.2                 | 0.1                  | 0.1                 | 0.7                  | 0.3                 | 2.3                  | 0.1                 | 3.0                 |
| C18H36O3                  | 15-hydroxy<br>stearic acid               | 323.2562                   | 24.0                   | 23.7               | 2.0                 | 23.8                | 18.4                 | 23.7                | 17.8                 | 26.0                | 22.1                 | 25.2                | 39.5                |
| C19H38O3                  | 3-Hydroxy-11-<br>methyl-stearic<br>acid  | 337.2719                   | 3.9                    | 1.3                | ND                  | 1.7                 | 1.9                  | 1.9                 | 1.6                  | 2.2                 | 1.2                  | 1.6                 | 2.1                 |
| C22H44O2                  | Behenic acid<br>(C22)                    | 363.3239                   | 5.1                    | 0.1                | ND                  | ND                  | ND                   | ND                  | ND                   | ND                  | ND                   | ND                  | ND                  |
| C16H30O2                  | Palmitoleic acid<br>(C16:1)              | 277.2143                   | 0.2                    | ND                 | ND                  | 0.1                 | ND                   | ND                  | ND                   | ND                  | ND                   | ND                  | ND                  |
| C16H32O2<br>Hexadecanoic  | Palmitic acid<br>(C16)                   | 279.2300                   | 2.6                    | 0.4                | 0                   | 1.1                 | 1.0                  | ND                  | ND                   | ND                  | 0.1                  | ND                  | 0.6                 |
| C17H34O2                  | Margaric acid<br>(C17:0)                 | 293.2456                   | ND                     | 0.3                | 2.3                 | ND                  | ND                   | 0.3                 | 1.3                  | ND                  | 0.0                  | ND                  | 0.0                 |
| C18H36O2<br>Octadecanoic  | Stearic acid<br>(C18:0)                  | 307.2613                   | ND                     | 1.8                | 7.6                 | 0.4                 | 0.8                  | 1.3                 | 4.8                  | ND                  | 1.2                  | ND                  | 0.0                 |
| C20H38O2<br>9Z-eicosenoic | Gadoleic acid<br>(C20:1)                 | 333.2769                   | 0.03                   | ND                 | 0.1                 | 1.8                 | 3.8                  | ND                  | ND                   | 0.2                 | 0.2                  | ND                  | 3.2                 |
| C20H40O2                  | Arachidic acid<br>(C20:0)                | 335.2926                   | ND                     | ND                 | 0.8                 | ND                  | ND                   | ND                  | ND                   | ND                  | 0.1                  | ND                  | ND                  |

**Table S2.** Relative abundance percentages of assigned unsaponifiable components in CWO and its fractions: (a) limonoids, (b) sterols, (c) other unsaponifiable components. The most predominant compound in each group is highlighted.

(a) Relative abundance percentages of assigned limonoids.

| Elemental Composition | Putative compound                    | $m/z$ [M+Na] <sup>+</sup> | CWO  | DSOLID | DLIQUID | ETSOLID | ETLIQUID | ACSOLID | ACLIQUID | EASOLID | EALIQUID | NSOLID | NLIQUID |
|-----------------------|--------------------------------------|---------------------------|------|--------|---------|---------|----------|---------|----------|---------|----------|--------|---------|
| C26H30O6              | 7-Deacetoxy-7-Oxogedunin             | 461.1940                  | 3.9  | 5.3    | 5.4     | 3.0     | 4.9      | 3.3     | 5.5      | 3.9     | 4.8      | 4.6    | 1.4     |
| C26H32O6              | 7-deactylgedunin                     | 463.2097                  | 0.5  | 0.7    | 0.5     | 0.3     | 0.3      | 0.3     | 0.4      | 0.5     | 0.6      | 0.5    | 0.2     |
| C28H34O6              | Deoxygedunin                         | 489.2253                  | 0.1  | 3.5    | 3.5     | 0.6     | 2.6      | 0.9     | 3.9      | 1.1     | 0.5      | 0.2    | 0.9     |
| C28H34O7              | Gedunin                              | 505.2202                  | 4.2  | 6.1    | 5.7     | 2.7     | 4.9      | 3.1     | 5.7      | 4.2     | 4.9      | 5.2    | 2.5     |
| C30H36O9              | 6 $\alpha$ -acetoxygedunin           | 563.2257                  | 4.1  | 6.1    | 5.7     | 3.1     | 4.7      | 3.5     | 5.5      | 4.3     | 4.5      | 8.5    | 2.9     |
| C27H32O7              | Andirobin                            | 491.2046                  | 5.9  | 6.4    | 6.9     | 5.1     | 6.7      | 5.4     | 6.7      | 4.8     | 5.5      | 4.3    | 5.3     |
| C27H34O7              | Methyl angolensate                   | 493.2202                  | 27.9 | 34.3   | 35.2    | 33.1    | 34.2     | 33.3    | 34.8     | 34.8    | 29.6     | 38.7   | 32.3    |
| C27H34O8              | Methyl 6-hydroxyangolensate          | 509.2151                  | 6.2  | 4.9    | 6.4     | 5.2     | 5.4      | 4.8     | 6.9      | 5.6     | 6.1      | 5.2    | 4.5     |
| C27H32O8              | 8beta-Hydroxycarapin, 3,8-Hemiacetal | 507.1995                  | 0.04 | 0.1    | 0.1     | 0.04    | 0.02     | 0.02    | 0.03     | 0       | 0.04     | 0      | 0.1     |
| C31H42O11             | Carapanolide A                       | 613.2625                  | 0.9  | 0.01   | 0.02    | 1       | 0.22     | 0.6     | 0.1      | 0.5     | 0.4      | 0.4    | 1.1     |
| C32H42O11             | Carapanolide B                       | 625.2625                  | 0.7  | 0.01   | 0.01    | 0.9     | 0.1      | 0.9     | 0.03     | 0.7     | 0.5      | 0.1    | 2       |
| C39H48O13             | Carapanolide K                       | 747.2993                  | 0.6  | 0      | 0       | 0.02    | 0        | 0.01    | 0        | 0       | 0.1      | 0.02   | 0       |
| C33H38O13             | Carapanolide L                       | 665.2210                  | 1.3  | 0.9    | 0.6     | 1.4     | 0.8      | 1.2     | 0.7      | 1.1     | 1        | 0.4    | 1.5     |
| C36H40O15             | Guianolide A                         | 735.2265                  | 0.4  | 0.03   | 0.04    | 0.5     | 0.08     | 0.3     | 0.04     | 0.2     | 0.1      | 0.1    | 0.3     |
| C34H38O14             | Guianolide B                         | 693.2159                  | 0.01 | 0      | 0       | 0.03    | 0.01     | 0.01    | 0        | 0       | 0        | 0      | 0       |
| C34H44O12             | 11-Acetoxykhivorin                   | 667.2730                  | 6.8  | 5.1    | 4.8     | 7.3     | 6        | 6.9     | 5.3      | 6.5     | 6.9      | 4.1    | 0       |
| C35H46O13             | Trichilin A                          | 697.2836                  | 17.9 | 14.6   | 14.4    | 21.3    | 16.2     | 19.9    | 12.9     | 16.9    | 18.3     | 16.5   | 22.4    |
| C28H34O5              | Azadiradione                         | 473.2304                  | 2.8  | 2.4    | 2.9     | 1.3     | 1.4      | 1.6     | 2.4      | 1.5     | 2        | 3.9    | 0.2     |
| C31H42O10             | Asclepin                             | 597.2676                  | 14   | 8.4    | 6.6     | 12.3    | 9.5      | 11.7    | 7.9      | 11      | 12.1     | 6.8    | 19.6    |

| Elemental Composition | Putative compound | $m/z$ [M+Na] <sup>+</sup> | CWO | D <sub>SOLID</sub> | D <sub>LIQUID</sub> | ET <sub>SOLID</sub> | ET <sub>LIQUID</sub> | AC <sub>SOLID</sub> | AC <sub>LIQUID</sub> | EA <sub>SOLID</sub> | EA <sub>LIQUID</sub> | NS <sub>SOLID</sub> | N <sub>LIQUID</sub> |
|-----------------------|-------------------|---------------------------|-----|--------------------|---------------------|---------------------|----------------------|---------------------|----------------------|---------------------|----------------------|---------------------|---------------------|
| C29H48O22             | NCGC00381438-01   | 771.2522                  | 1.8 | 1.2                | 1.4                 | 0.9                 | 1.7                  | 2.5                 | 1.3                  | 2.2                 | 2.1                  | 0.6                 | 2.8                 |

(b) Relative abundance percentages of assigned sterols and phosphoglycerols (PG).

| Elemental Composition | Compound                                                                   | $m/z$ [M+Na] <sup>+</sup> | CWO  | D <sub>SOLID</sub> | D <sub>LIQUID</sub> | ET <sub>SOLID</sub> | ET <sub>LIQUID</sub> | AC <sub>SOLID</sub> | AC <sub>LIQUID</sub> | EA <sub>SOLID</sub> | EA <sub>LIQUID</sub> | NS <sub>SOLID</sub> | N <sub>LIQUID</sub> |
|-----------------------|----------------------------------------------------------------------------|---------------------------|------|--------------------|---------------------|---------------------|----------------------|---------------------|----------------------|---------------------|----------------------|---------------------|---------------------|
| C33H51O13P            | PI 24:6 (1-stearoyl-2-arachidonoyl-sn-glycero-3-phospho-(1'-myo-inositol)) | 709.2965                  | 43.3 | 68                 | 66                  | 82.9                | 68.7                 | 76.9                | 60.6                 | 63.6                | 60.3                 | 37.9                | 64.2                |
| C27H46O5              | Certonardosterol L                                                         | 473.3243                  | 12.4 | 0.1                | 0.4                 | 0                   | 0                    | 0                   | 0                    | 0                   | 0                    | 0                   | 0                   |
| C27H42O2              | 24-keto-25dehydrocholesterol                                               | 421.3082                  | 1    | 0.9                | 0.4                 | 2.2                 | 1.1                  | 1.9                 | 0.7                  | 1.6                 | 1.8                  | 0                   | 29.4                |
| C28H40O8              | Ixocarpalactone A                                                          | 527.2621                  | 2.6  | 0.1                | 1.2                 | 0.7                 | 0.6                  | 0.7                 | 0.2                  | 1.1                 | 0.9                  | 0.3                 | 3.1                 |
| C29H46O7              | 2-deoxy-20-hydroxy-5alpha-ecdysone 3-acetate                               | 529.3141                  | 21.5 | 26                 | 25.3                | 13.5                | 24                   | 19.5                | 30.3                 | 32.4                | 35.8                 | 58.2                | 3                   |
| C30H52O6              | 6beta-acetoxy-24-methylcholestan-3beta,5alpha,22R,24-tetrol                | 531.3662                  | 18.2 | 0.8                | 0.5                 | 0                   | 0.04                 | 0.03                | 0.2                  | 0                   | 0                    | 0                   | 0.1                 |
| C28H48O9              | Campesterol                                                                | 551.3196                  | 0.4  | 3.1                | 1.4                 | 0.7                 | 0.7                  | 0.6                 | 1.1                  | 1.3                 | 1.2                  | 3.5                 | 0                   |
| C29H48O               | Stigmasterol                                                               | 435.3603                  | 0.6  | 0.9                | 4.7                 | 0                   | 4.9                  | 0.4                 | 6.9                  | 0                   | 0                    | 0.1                 | 0.3                 |

(c) Relative abundance percentages of “*other unsaponifiable compounds*”.

| Elemental Composition | Compound                                                                                                                   | $m/z$<br>[M+Na] <sup>+</sup> | CWO  | D <sub>SOLID</sub> | D <sub>LIQUID</sub> | ET <sub>SOLID</sub> | ET <sub>LIQUID</sub> | AC <sub>SOLID</sub> | AC <sub>LIQUID</sub> | EA <sub>SOLID</sub> | EA <sub>LIQUID</sub> | N <sub>SOLID</sub> | N <sub>LIQUID</sub> |
|-----------------------|----------------------------------------------------------------------------------------------------------------------------|------------------------------|------|--------------------|---------------------|---------------------|----------------------|---------------------|----------------------|---------------------|----------------------|--------------------|---------------------|
| C42H46O14             | (2R,3S)-2,3-trans-3-Acetoxy-5-[(2R,3S)-2,3-trans-3-acetoxy-3',4',7,8-tetramethoxyflavan-5-yl]-3',4',7,8-tetramethoxyflavan | 797.2785                     | 77.5 | 74.6               | 69.8                | 75.5                | 72.1                 | 73.6                | 76.7                 | 75.9                | 72.9                 | 0                  | 55                  |
| C35H60O7              | alpha-Tocopherol-beta-D-mannoside                                                                                          | 615.4237                     | 1.5  | 9.3                | 2.1                 | 2.3                 | 3.7                  | 2.4                 | 1.4                  | 0                   | 0.7                  | 0                  | 10.9                |
| C43H44N2O10           | Milliamine C; 5-Anthraniloyl type moiety, 20-Ac-Ingenol diterpenoid                                                        | 771.2894                     | 21.0 | 16.1               | 28.1                | 22.2                | 24.2                 | 24.0                | 21.9                 | 24.1                | 26.4                 | 100                | 34.2                |

**Table S3.** (a) Crystallization and (b) Melting data of **CWO** and its fractions (Temperature  $\pm 0.5$  °C, Enthalpy  $\Delta H \pm 2.5$  J/g).

a) Crystallization data.

| Sample              | $T_{ON}$ | $T_{c1}$              | $\Delta H_1$ | $T_{c2}$                | $\Delta H_2$ | $T_{c3}$                  | $\Delta H_3$ | $T_{OFF}$ | $\Delta H_{tot}$ |
|---------------------|----------|-----------------------|--------------|-------------------------|--------------|---------------------------|--------------|-----------|------------------|
|                     |          | Zone I ~ (40 to 3 °C) |              | Zone II ~ (3 to -35 °C) |              | Zone II ~ (-35 to -60 °C) |              |           |                  |
| CWO                 | 15.6     | 11.4                  | 12.8         | -3.4                    | 27.2         | -47.4                     | 12.3         | -51.5     | 52.3             |
| N <sub>SOLID</sub>  | 28.1     | 25.5                  | 32.6         | -6.3                    | 24.7         | -31.7                     | 29.9         | -51.7     | 87.2             |
| N <sub>LIQUID</sub> | 17.3     | 11.8                  | 2.4          | -0.8                    | 43.4         | -32.2                     | 4.9          | -49.9     | 50.7             |
| D <sub>SOLID</sub>  | 27.6     | 26.0                  | 29.6         | -2.3                    | 29.2         | -45.8                     | 12.6         | -51.3     | 71.4             |

|                      |      |      |      |      |      |       |      |       |      |
|----------------------|------|------|------|------|------|-------|------|-------|------|
| D <sub>LIQUID</sub>  | 5.3  | --   | 0    | -1.7 | 30.3 | -45.1 | 11.7 | -50.1 | 42   |
| ET <sub>SOLID</sub>  | 25.5 | 23.5 | 25.2 | -4.0 | 18.9 | -26.1 | 32.3 | -37.4 | 76.4 |
| ET <sub>LIQUID</sub> | 14.5 | 11.0 | 4.9  | 0.6  | 52.8 | -50.4 | 7.3  | -58.8 | 65   |
| AC <sub>SOLID</sub>  | 18.4 | 16.3 | 16.9 | -4.0 | 37   | -45.1 | 19.6 | -49.4 | 73.5 |
| AC <sub>LIQUID</sub> | 25.6 | 16.8 | 14.1 | 2.8  | 22.2 | -44.6 | 6.7  | -54.6 | 43   |
| EA <sub>SOLID</sub>  | 18.4 | 17.0 | 14.4 | -3.3 | 26.9 | -46.9 | 10.9 | -52.2 | 52.2 |
| EA <sub>LIQUID</sub> | 15.9 | 9.0  | 12.2 | -4.4 | 23.9 | -47.5 | 11.7 | -51.5 | 47.8 |

**b) Melting data.**

| Sample               | $T_{ON}$ | Temperature range |              |              |              |                   |              |              |               |              |                      | $T_{OFF}$ | $\Delta H_{tot}$ |
|----------------------|----------|-------------------|--------------|--------------|--------------|-------------------|--------------|--------------|---------------|--------------|----------------------|-----------|------------------|
|                      |          | 60°C to 25°C      |              | 25°C to 10°C |              | $\sum \Delta H_I$ | 10°C to -5°C |              | -5°C- to 60°C |              | $\sum \Delta H_{II}$ |           |                  |
|                      |          | $T_{m1}$          | $\Delta H_1$ | $T_{m2}$     | $\Delta H_2$ |                   | $T_{m3}$     | $\Delta H_3$ | $T_{m4}$      | $\Delta H_4$ |                      |           |                  |
| CWO                  | -21.4    | 27.1              | 5.5          | 20.2         | 9.8          | 15.3              | -0.4         | 24.7         | -9.5          | 33.5         | 58.1                 | 32.5      | 73.2             |
| N <sub>SOLID</sub>   | -22.5    | 31.2              | 33.3         | 0            | 0            | 33.3              | 8.6          | 7.9          | -7.7          | 40.8         | 48.7                 | 39.8      | 82               |
| N <sub>LIQUID</sub>  | -23.4    | 0                 | 0            | 0            | 0            | 0                 | 2.9          | 40.5         | -10           | 8.6          | 49.1                 | 10.0      | 49.6             |
| D <sub>SOLID</sub>   | -21.4    | 36.7              | 20.8         | 18.4         | 4.7          | 25.5              | 0.6          | 24.3         | -8.8          | 32.9         | 57.2                 | 41.3      | 82.70            |
| D <sub>LIQUID</sub>  | -20.4    | 0                 | 0            | 0            | 3.6          | 3.6               | 1.7          | 20.1         | -8.2          | 23.6         | 43.7                 | 20.6      | 47.3             |
| ET <sub>SOLID</sub>  | -21.4    | 19.5              | 24.8         | 15.7         | 13.5         | 38.3              | 4.8          | 0            | -11.2         | 40.0         | 40                   | 25.1      | 78.2             |
| ET <sub>LIQUID</sub> | -19.8    | 34.6              | 4.9          | 0            | 0            | 4.9               | 13.2         | 49.9         | -11.2         | 15.2         | 65.1                 | 39        | 70               |
| AC <sub>SOLID</sub>  | -23.2    | 23.4              | 14.7         | 0            | 6.3          | 21                | 10.8         | 1.5          | -9.8          | 50.8         | 52.3                 | 29.4      | 73.3             |

|                      |       |      |      |      |      |      |      |      |       |      |      |      |      |
|----------------------|-------|------|------|------|------|------|------|------|-------|------|------|------|------|
| AC <sub>LIQUID</sub> | -19.8 | 28.6 | 2.9  | 0    | 54   | 56.9 | 10.5 | 0    | -9.9  | 18.1 | 18.1 | 33.7 | 75   |
| EA <sub>SOLID</sub>  | -21.5 | 44.4 | 0.9  | 27.6 | 14.6 | 15.5 | 0.2  | 20.5 | -9.2  | 30.9 | 51.4 | 49.2 | 67.1 |
| EA <sub>LIQUID</sub> | -21.8 | 27.7 | 15.1 | 21   | -    | 15.1 | -0.6 | 54.4 | -9.24 | -    | 54.4 | 31.7 | 69.5 |

**Table S4.** (a) WAXD and (b) SAXD data.  $\chi$  (%): crystallinity **Typical Peaks for phase identification (Å)**

| (a) WAXD            | Form     | Primary peaks (Å) |      | Secondary peaks (Å) |     |      | $\chi$ (%) |
|---------------------|----------|-------------------|------|---------------------|-----|------|------------|
|                     |          | (-110) (110)      | 200  | 020                 | 100 |      |            |
| CWO                 | $\beta'$ | 4.14              | 3.73 |                     |     |      | 5 $\pm$ 1  |
| D <sub>SOLID</sub>  | $\beta'$ | 4.12              | 3.72 |                     |     | 4.33 | 19 $\pm$ 1 |
| ET <sub>SOLID</sub> | $\beta'$ | 4.13              | 3.75 |                     |     | 4.35 | 15 $\pm$ 1 |
| AC <sub>SOLID</sub> | $\beta'$ | 4.12              | 3.72 |                     |     |      | 5 $\pm$ 1  |

| (b) SAXD (Å)        | Form     | 001  | 002 | 003  | 004 | Configuration                |
|---------------------|----------|------|-----|------|-----|------------------------------|
| CWO                 | $\beta'$ | 38.1 | --  | 12.4 | --  | DCL - C16 fork configuration |
| D <sub>SOLID</sub>  | $\beta'$ | 38.8 | --  | 12.8 | --  | DCL - C16 fork configuration |
| ET <sub>SOLID</sub> | $\beta'$ | 38.1 | --  | 12.7 | --  | DCL - C16 fork configuration |
| AC <sub>SOLID</sub> | $\beta'$ | 38.2 | --  | 12.6 | --  | DCL - C16 fork configuration |



**Table S5.** DTG and TGA data for CWO and its fractions. (T  $\pm$ 2.5°C; Rm  $\pm$ 0.03%/°C)

| Sample               | TD1 (°C)      | Rm1<br>(%/°C) | TD2<br>(°C) | Rm2<br>(%/°C) | TD3<br>(°C) | Rm3<br>(%/°C) | Ton<br>(°C) | T @ 5%<br>mass loss | Ash % |
|----------------------|---------------|---------------|-------------|---------------|-------------|---------------|-------------|---------------------|-------|
| CWO                  | 229.2         | 0.37          | 393.9       | 1.38          | --          | --            | 173.8       | 201.3               | 0.3   |
| N <sub>SOLID</sub>   | 237.1         | 0.7           | 381.1       | 1.00          | 430.7       | 0.02          | 181.8       | 194.7               | 0.8   |
| N <sub>LIQUID</sub>  | 224.9         | 0.15          | 398.3       | 1.58          | --          | --            | 169.7       | 200.7               | 0     |
| D <sub>SOLID</sub>   | 229.0         | 0.4           | 389.1       | 1.41          | 438.6       | 0.02          | 169.8       | 195.9               | 0.8   |
| D <sub>LIQUID</sub>  | 239.8         | 0.28          | 397.3       | 1.50          | 441.9       | 0.03          | 181.5       | 212.9               | 0.9   |
| ET <sub>SOLID</sub>  | 234.5         | 0.65          | 380.0       | 0.91          | 431.3       | 0.10          | 177.1       | 192.0               | 0.3   |
| ET <sub>LIQUID</sub> | 226.6         | 0.10          | 396.9       | 1.80          | 431.3       | 0.06          | 172.7       | 225.2               | 0.4   |
| AC <sub>SOLID</sub>  | 232.4 [265.9] | 0.36 [0.23]   | 388.6       | 1.45          | 453.9       | 0.02          | 175.5       | 201.6               | 0.9   |
| AC <sub>LIQUID</sub> | 234.7 [262.8] | 0.19 [0.16]   | 393.6       | 1.79          | 431.3       | 0.07          | 171.1       | 220.2               | 1.1   |
| EA <sub>SOLID</sub>  | 232.4         | 0.30          | 382.5       | 1.60          | 425.0       | 0.10          | 170.5       | 204.4               | 1.2   |
| EA <sub>LIQUID</sub> | 224.8         | 0.30          | 386.5       | 1.30          | 432.9       | 0.05          | 164.1       | 194.9               | 0     |
